# Supplementary material for: Is biofilm removal properly assessed? Comparison of different quantification methods in a 96-well plate system
Source: PubMed Central journal article supplement (PMC4824840; doi:10.1007/s00253-016-7396-9), 2016-02-29

**Is biofilm removal properly assessed? Comparison of different quantification methods in a 96-well plate system**

Philipp Stiefel<sup>1</sup>, Urs Rosenberg<sup>2</sup>, Jana Schneider<sup>1</sup>, Stefan Mauerhofer<sup>2</sup>, Katharina Maniura-Weber<sup>1</sup>, Qun Ren<sup>1\*</sup>

<sup>1</sup> Laboratory for Biointerfaces, Empa, Swiss Federal Laboratories for Materials Science and Technology, Lerchenfeldstrasse 5, CH-9014 St. Gallen, Switzerland

<sup>2</sup> Borer Chemie AG, Gewerbestrasse 13, 4528 Zuchwil, Switzerland

\* Corresponding author

E-mail: qun.ren@empa.ch, phone: +41 58 765 7688, fax: +41 58 765 7499

**Table S1: Summary of biofilm removal capacity of the cleaners tested in this study.**

| Cleaner  | Enzymes supplemented in the cleaners            | Claim for Biofilm removal | Biomass (CV) (SR) |                   | Bacteria (AO) (SYTO9) |                   | Viability (BacTiter) (Turbidity) |                       | EPS (FITC)    |               |
|----------|-------------------------------------------------|---------------------------|-------------------|-------------------|-----------------------|-------------------|----------------------------------|-----------------------|---------------|---------------|
|          |                                                 |                           | <i>P.a.</i>       | <i>S.a.</i>       | <i>P.a.</i>           | <i>S.a.</i>       | <i>P.a.</i>                      | <i>S.a.</i>           | <i>P.a.</i>   | <i>S.a.</i>   |
| <b>A</b> | protease, lipase, amylase                       | yes                       | ++<br>78%<br>79%  | +++<br>95%<br>94% | ++<br>43%<br>84%      | +++<br>60%<br>99% | +++<br>96.4%<br>95.3%            | ++<br>98.3%<br>99.8%  | ++<br>85%     | +++<br>95%    |
| <b>B</b> | protease, amylase, cellulase                    | yes                       | +++<br>89%<br>87% | +++<br>89%<br>92% | +++<br>57%<br>92%     | +++<br>77%<br>99% | +++<br>97.5%<br>98.3%            | ++<br>98.4%<br>99.7%  | +++<br>91%    | +++<br>97%    |
| <b>C</b> | protease, lipase, amylase                       | none                      | ++<br>53%<br>76%  | +<br>16%<br>67%   | 0<br>-%<br>-%         | 0<br>-6%<br>51%   | +++<br>99.4%<br>100%             | +++<br>99.6%<br>100%  | 0<br>-%<br>-% | 0<br>-%<br>-% |
| <b>D</b> | protease, lipase, amylase, cellulase, mannanase | yes                       | 0<br>0%<br>16%    | ++<br>75%<br>84%  | 0<br>-%<br>-%         | ++<br>43%<br>88%  | +<br>56%<br>20%                  | +++<br>99.3%<br>99.9% | 0<br>-%<br>-% | +++<br>95%    |
| <b>E</b> | none                                            | yes                       | +<br>31%<br>46%   | 0<br>0%<br>43%    | 0<br>-%<br>-%         | 0<br>-32%<br>50%  | ++<br>73%<br>64%                 | +++<br>99.4%<br>99.9% | 0<br>-%<br>-% | ++<br>77%     |
| <b>X</b> | 4 enzymes                                       | yes                       | +++<br>90%<br>86% | +++<br>93%<br>95% | +++<br>64%<br>90%     | +++<br>76%<br>99% | +++<br>98.0%<br>97.2%            | +++<br>99.8%<br>99.9% | +++<br>92%    | +++<br>97%    |

% reduction measured by different methods is indicated (order as indicated in the heading).

+++ : biofilm reduction >80% in average of the used methods or >90% in one of the method;

++ : biofilm reduction >50% in average, but none >90%;

+ : biofilm reduction 25% - 50% in average and

0 : biofilm reduction <25% in average.

Those terms were applied to all methods, except that for the viability of *S.a.* the threshold for '+++ ' was set to 99% due to strong reduction of all cleaners.

*P.a.*: *Pseudomonas aeruginosa*; *S.a.*: *Staphylococcus aureus*;

CV: Crystal Violet staining

SR: Safranin Red staining

AO: Acridine Orange staining

SYTO9: SYTO9 staining

BacTiter: BacTiter-Glo assay

Turbidity: Turbidity Threshold method

FITC: Fluorescein isothiocyanate

**Figure S1: Arrangement of the samples in 96-well plates** during biofilm formation (a), cleaner treatment (b) and staining (c).

**Figure S2: Location of biofilm.** *P. aeruginosa* (a) and *S. aureus* (b) biofilms were formed for 24 hours at 33°C, and subsequently stained with Crystal Violet for visualization. The locations with most biofilm are indicated by arrows.

**Figure S3: Quantification of total cell content by SYTO9.** *P. aeruginosa* (a) and *S. aureus* (b) biofilms were treated with different cleaners. Y-axis represents the fluorescent signal values relative to the negative control. Error bars are generated from six replicas. A t-test was applied to each cleaner treatment compared to negative control to calculate if the differences are statistically significant (\*,  $p < 0.05$ ) or highly significant (\*\*,  $p < 0.001$ ).

**Figure S4: Quantification of viable cells by proliferation for the Turbidity Threshold method.** *P. aeruginosa* (a) and *S. aureus* (b) biofilms were treated with different cleaners. Optical density of growing cells after the treatment is displayed over time. Mean value of 6 replicas is shown.

**Figure S5: Quantification of viable cells by Tetrazolium salt.** *P. aeruginosa* (a) and *S. aureus* (b) biofilms were treated with different cleaners. Y-axis represents the OD values relative to the negative control. Error bars are generated from six replicas. A t-test was applied to each cleaner treatment compared to negative control to calculate if the differences are statistically highly significant (\*\*,  $p < 0.001$ ).

**Figure S6: Quantification of viable cells by SYTO9/PI staining.** *P. aeruginosa* (a) and *S. aureus* (b) biofilms were treated with different cleaners. Y-axis represents the fluorescent signal values relative to the negative control. Error bars are generated from six replicas. A t-test was applied to each cleaner treatment compared to negative control to calculate if the differences are statistically highly significant (\*\*,  $p < 0.001$ ) or not significant (n.s.,  $p > 0.05$ ).



Fig. S2

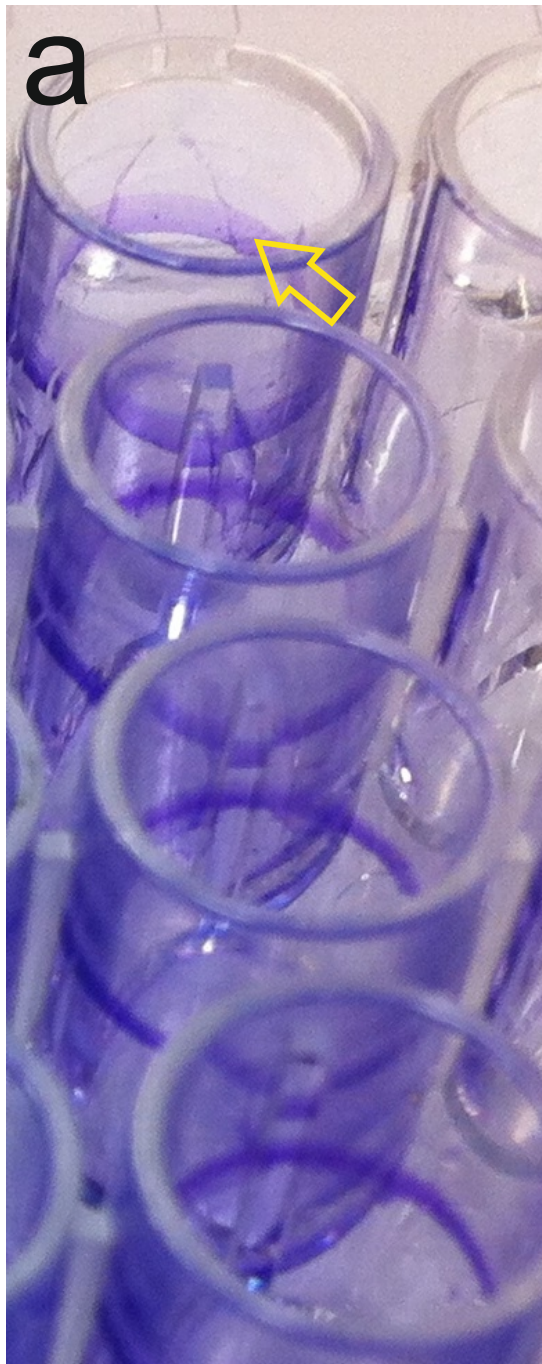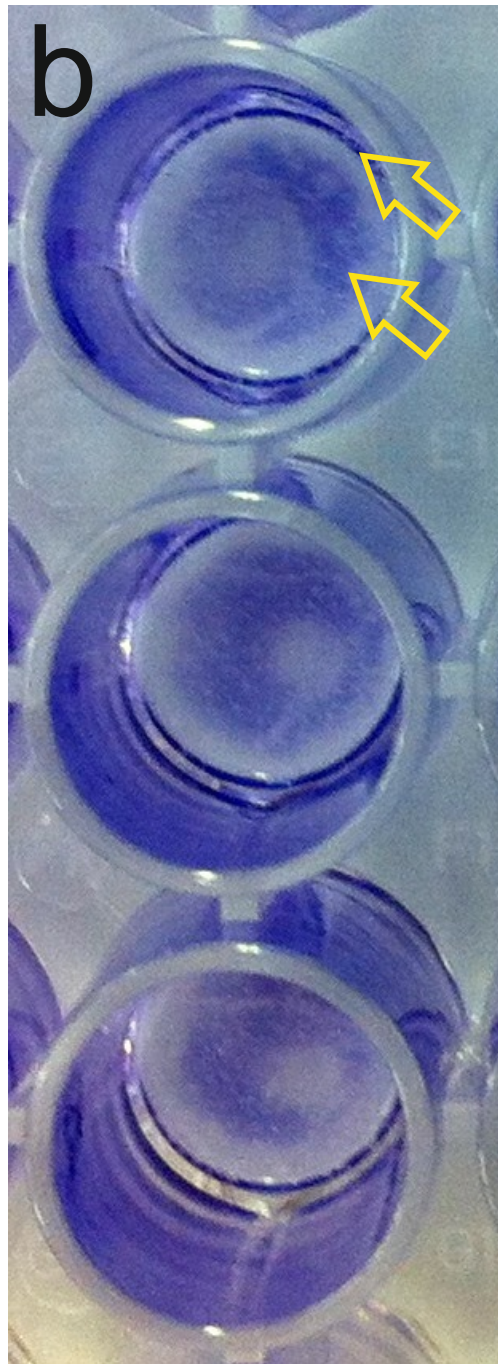

Fig. S3

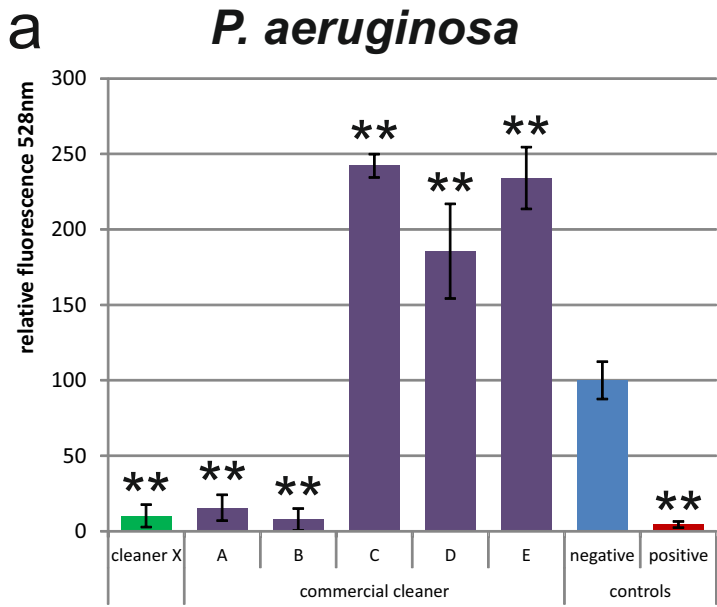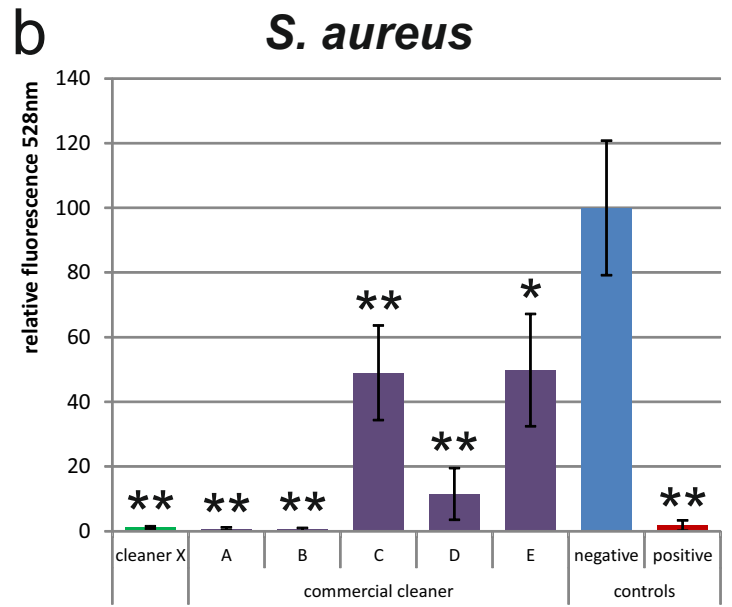

SYTO9

Fig. S4

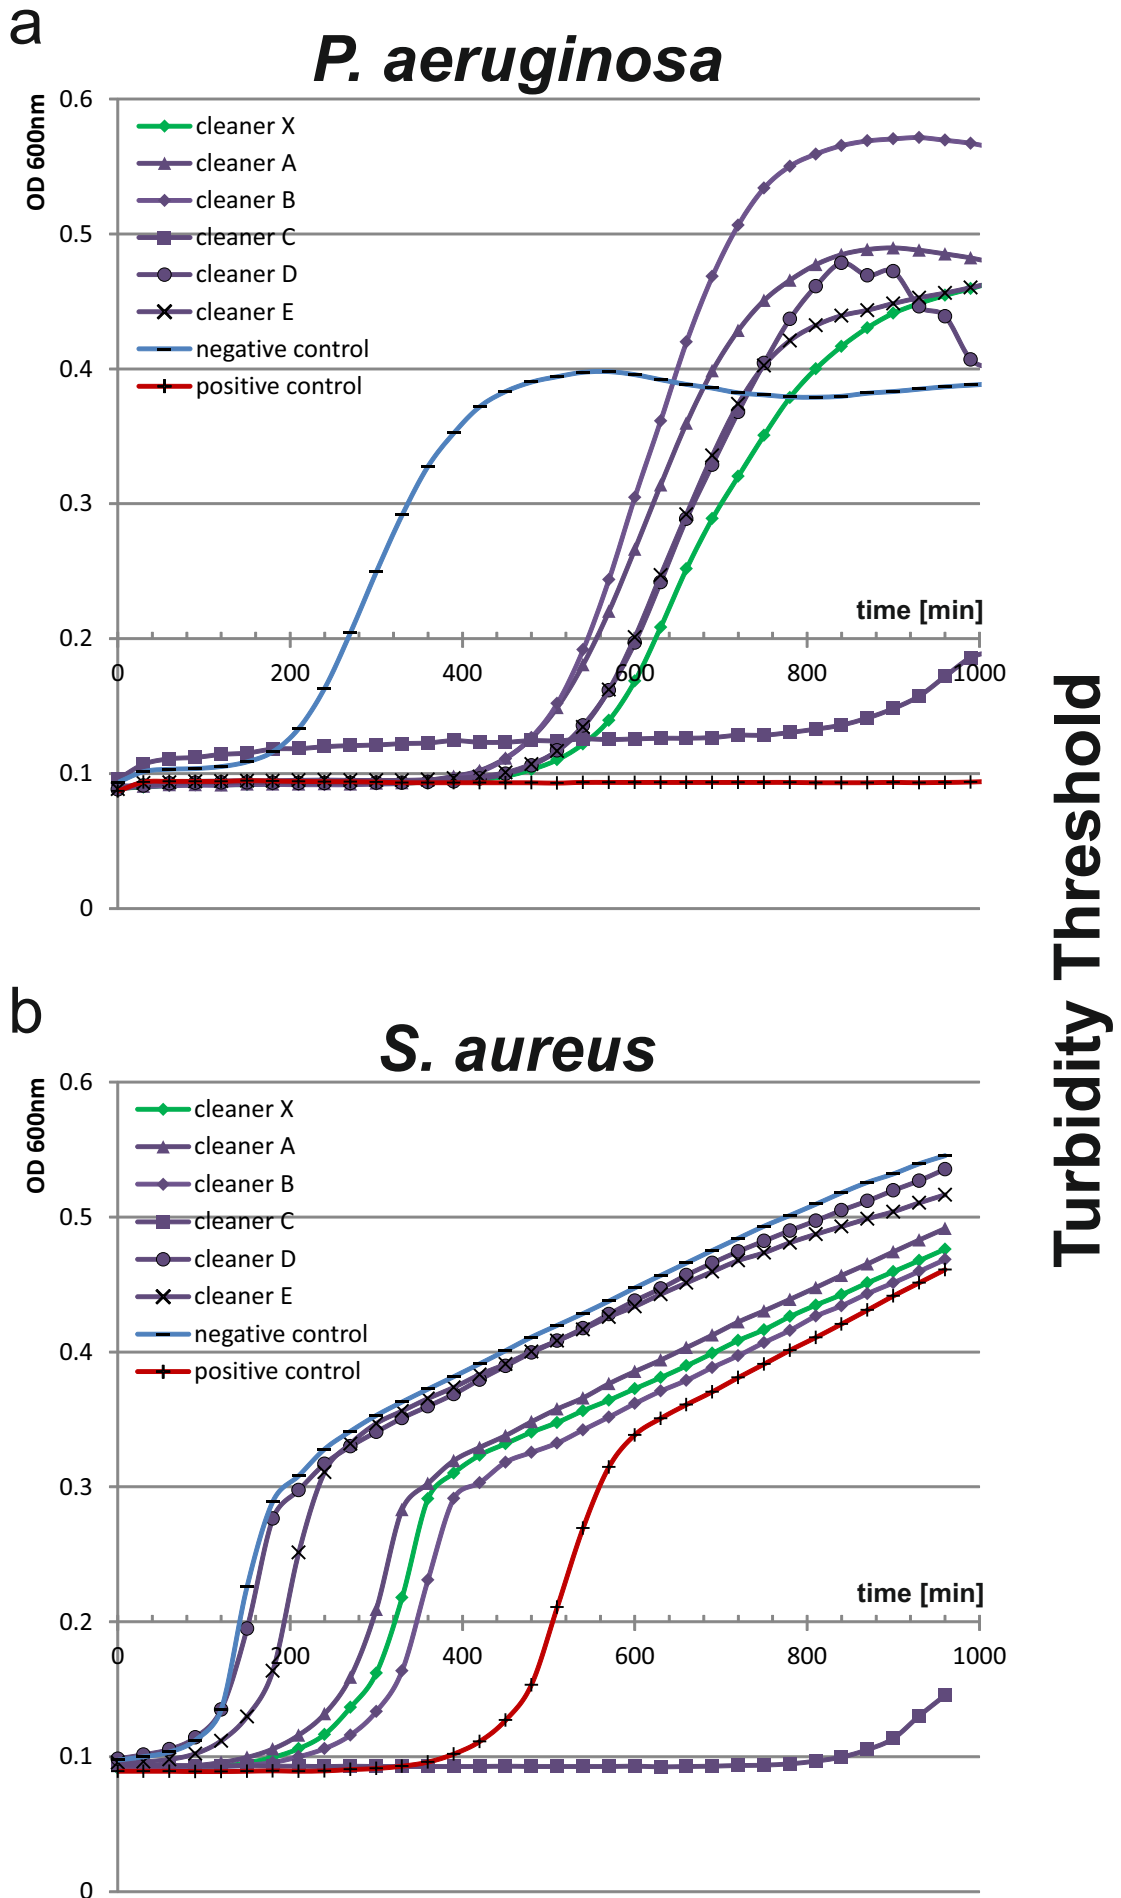

Fig. S5

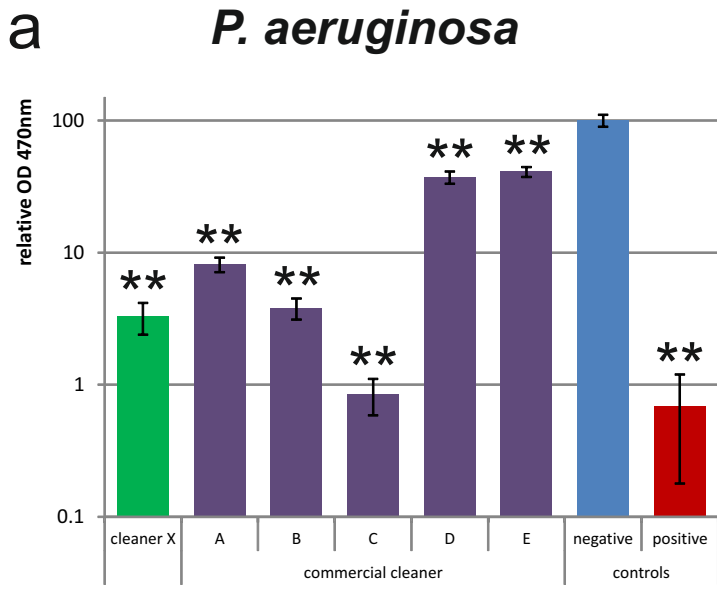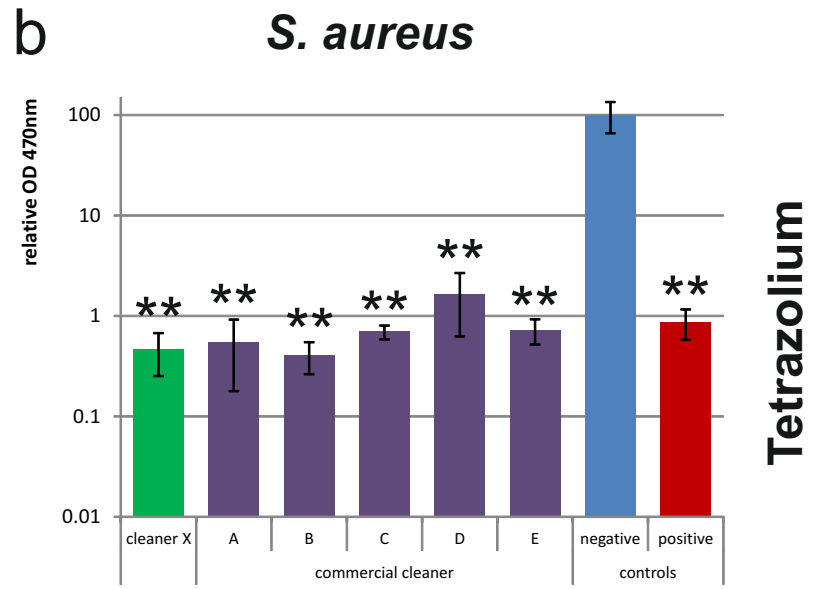



Fig. S6

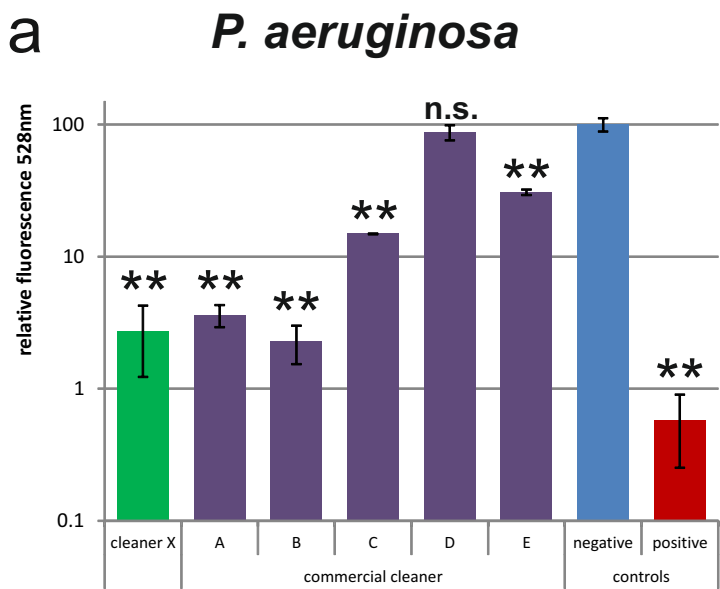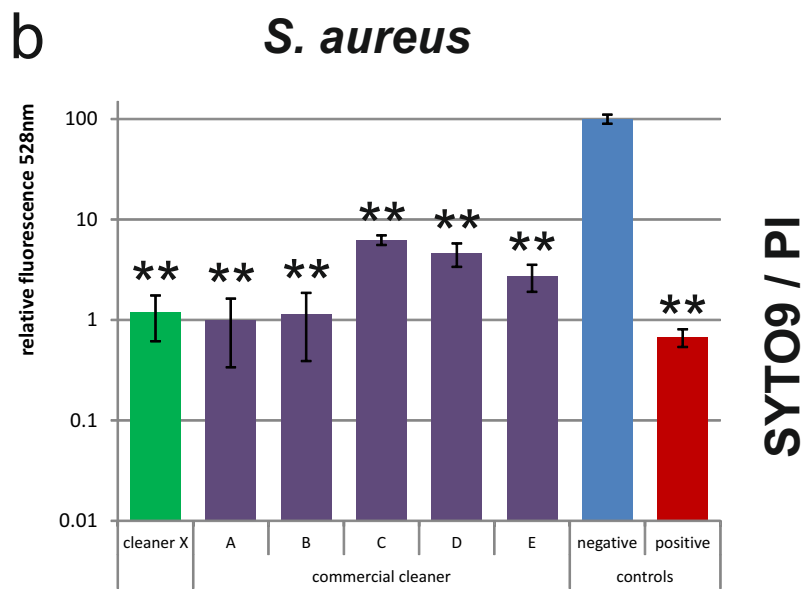

Supplement: 253_2016_7396_MOESM1_ESM.pdf [file 253_2016_7396_MOESM1_ESM.pdf]
